# Supplementary material for: Promoting sulphur conversion chemistry with tri-modal porous N, O-codoped carbon for stable Li–S batteries
Source: Royal Society of Chemistry journal article supplement (doi:10.1039/d0ta12110j), 2021-01-01
Supplement: d0ta12110j1.pdf [file d0ta12110j1.pdf]

## Supporting Information

# Promoting sulphur conversion chemistry with Tri-modal porous N, O-codoped carbon for stable Li-S batteries

Dapeng Wu,<sup>ab</sup> Jiayi Liu,<sup>b</sup> Junliang Chen,<sup>a,b</sup> Huanhuan Li,<sup>b\*</sup> Ruiguo Cao,<sup>c\*</sup> Wenchao Zhang,<sup>d</sup>  
Zhiyong Gao,<sup>b</sup> Kai Jiang<sup>a\*</sup>

<sup>a</sup> School of Environment, Henan Normal University, Xixiang, Henan 453007, P. R. China

<sup>b</sup> Collaborative Innovation Center of Henan Province for Green Manufacturing of Fine Chemicals, Key Laboratory of Green Chemical Media and Reactions, Ministry of Education, School of Chemistry and Chemical Engineering, Henan Normal University, Xixiang, Henan 453007, P. R. China

<sup>c</sup> Department of Materials Science and Engineering, University of Science and Technology of China, Hefei, Anhui 230026, P. R. China.

<sup>d</sup> Institute for Superconducting & Electronic Materials, School of Mechanical, Materials, Mechatronics & Biomedical Engineering, Faculty of Engineering and Information Sciences, University of Wollongong, NSW 2500, Australia.

**\*Corresponding author:** Huanhuan Li, Ruiguo Cao, Kai Jiang

E-mail: 2017076@htu.edu.cn; rgcao@ustc.edu.cn; jiangkai6898@126.com

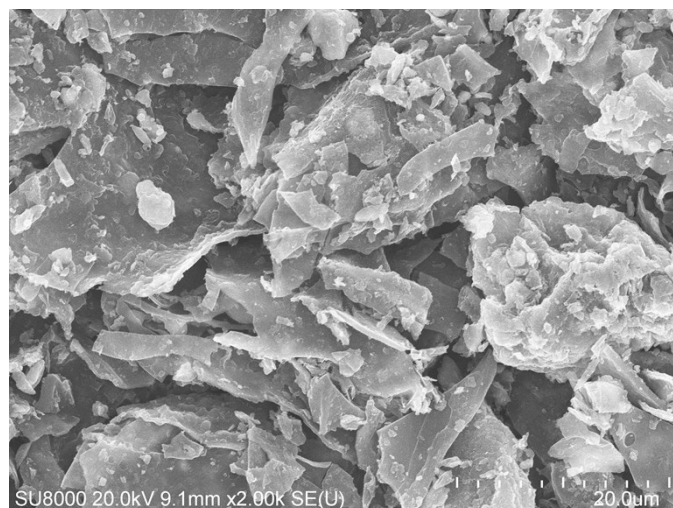

**Figure S1.** SEM image of the collected bagasse.

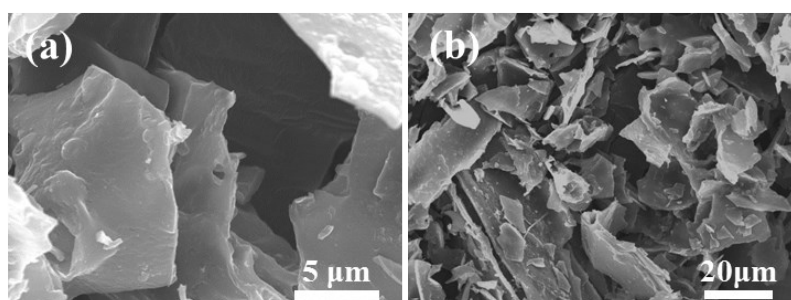

**Figure S2.** SEM images of pristine bagasse after pre-carbonization at 600 °C.

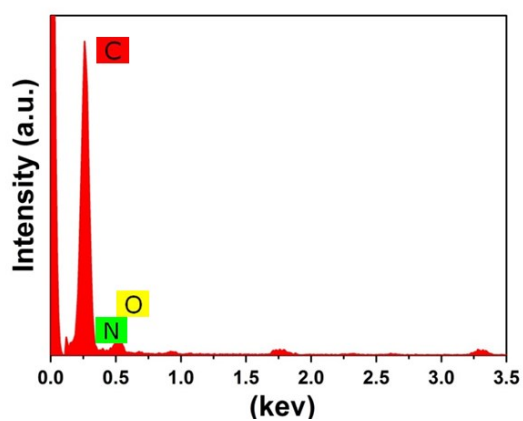

**Figure S3.** EDS spectrum of the TD-HDC sample.

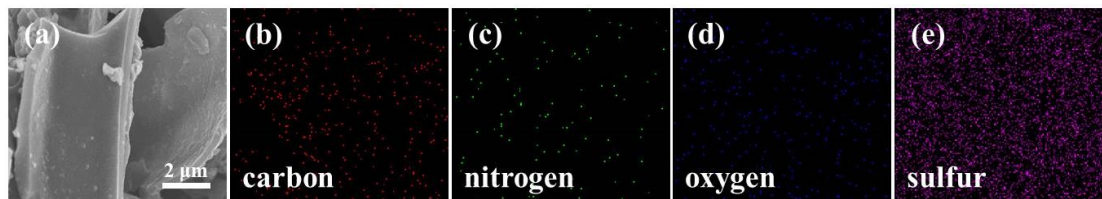

**Figure S4.** SEM and EDS mapping images of the S/TD-HDC sample.

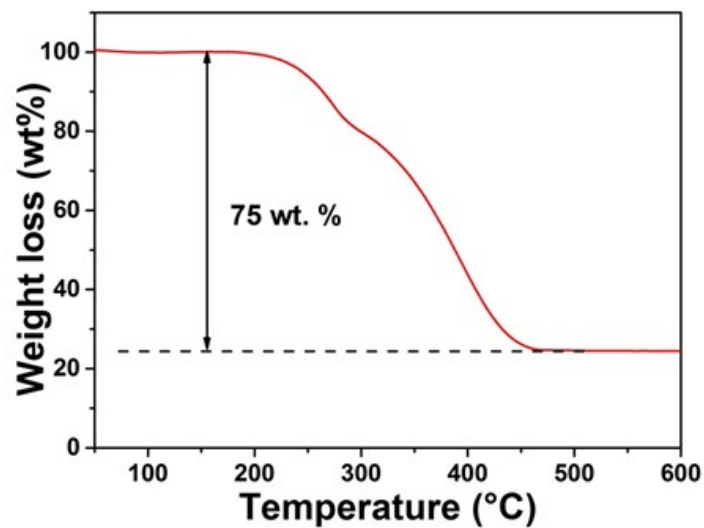

**Figure S5.** The TGA curve of the obtained S/TD-HDC under the N<sub>2</sub> atmosphere.

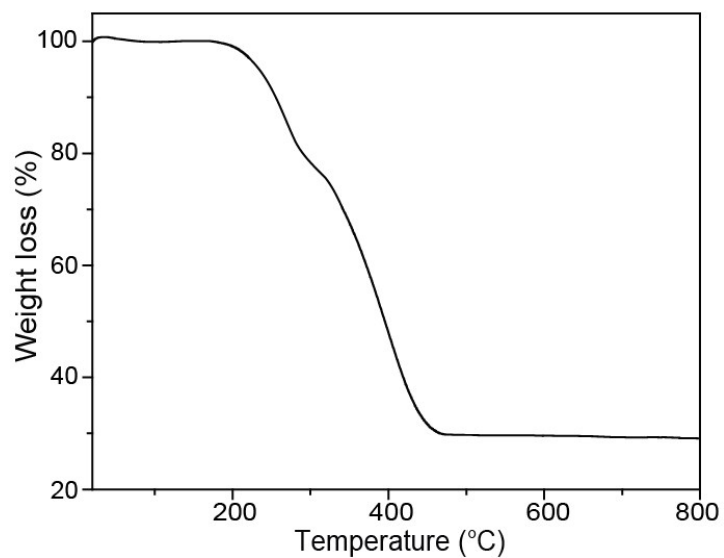

**Figure S6.** The TGA curve of the obtained S/HDC under the N<sub>2</sub> atmosphere.

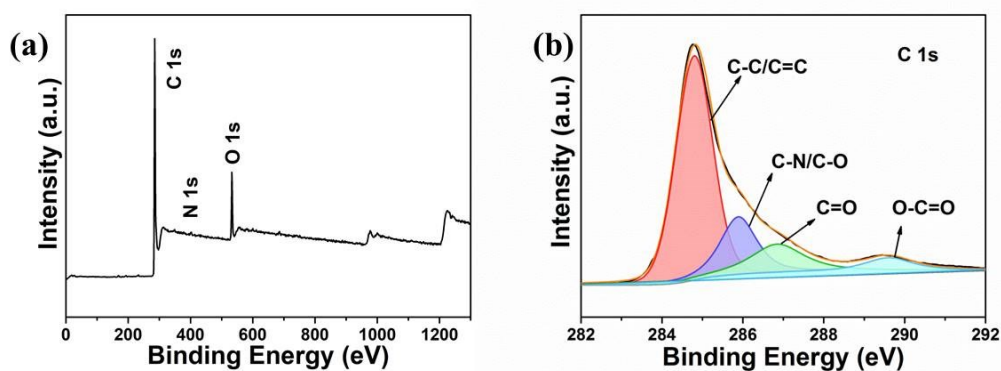

Figure S7. (a) Survey and (b) high-resolution C 1s XPS spectra of TD-HDC.

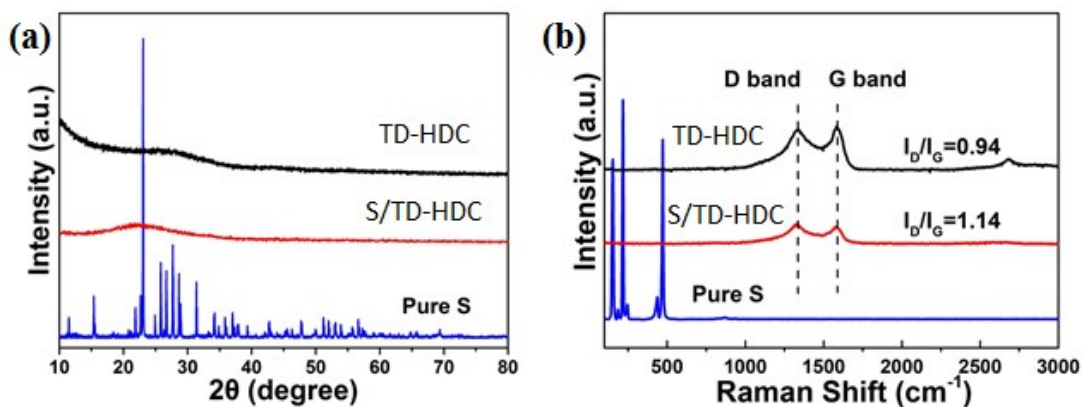

Figure S8. XRD and Raman patterns of the S/TD-HDC.

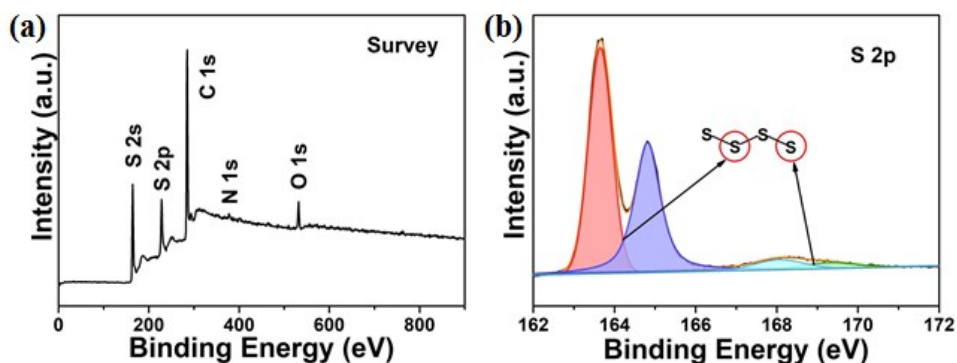

Figure S9. (a) Survey and (b) high-resolution S 2p spectra of S/TD-HDC.

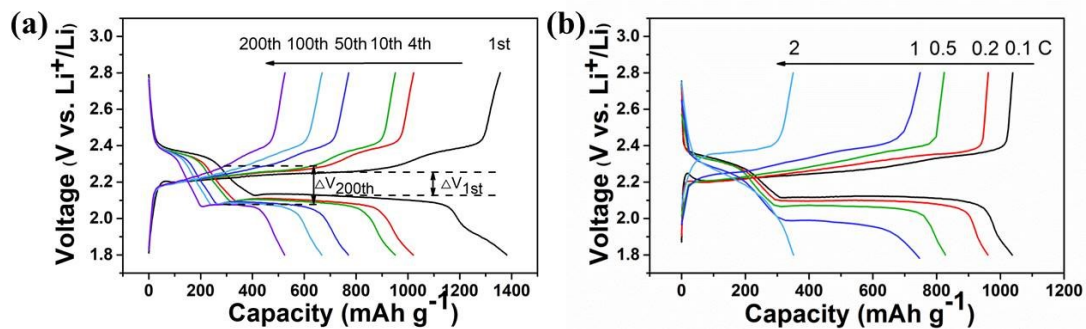

**Figure S10.** Discharge and charge profiles of the S/HDC cathode at (a) 0.2 C and (b) different rates, respectively.

**Table S1** Specific surface areas and pore textural parameters of the as-obtained porous carbon materials.

| <i>Samples</i> | <i>S<sub>total</sub> (m<sup>2</sup> g<sup>-1</sup>)</i> | <i>V<sub>total</sub> (cm<sup>3</sup> g<sup>-1</sup>)</i> | <i>V<sub>micro</sub> (cm<sup>3</sup> g<sup>-1</sup>)</i> | <i>V<sub>meso</sub> (cm<sup>3</sup> g<sup>-1</sup>)</i> |
|----------------|---------------------------------------------------------|----------------------------------------------------------|----------------------------------------------------------|---------------------------------------------------------|
| HDC            | 2043.8                                                  | 0.9758                                                   | 0.7267                                                   | 0.2491                                                  |
| TD-HDC         | 1758.1                                                  | 1.2237                                                   | 0.5392                                                   | 0.6845                                                  |

**Table S2** Elemental analysis of HDC and TD-HDC from XPS results.

| <i>Samples</i> | <i>C (at%)</i> | <i>N (at%)</i> | <i>O (at%)</i> |
|----------------|----------------|----------------|----------------|
| HDC            | 91.4           | 0.86           | 7.74           |
| TD-HDC         | 88.01          | 1.1            | 10.89          |

**Table S3.** Comparisons of TD-HDC and other carbon materials reported in the literatures serving as sulfur hosts for LSBs.

| Materials                                    | Sulfur Content (wt%) | Electrochemical performance                                                            | Refs.            |
|----------------------------------------------|----------------------|----------------------------------------------------------------------------------------|------------------|
| N, O codoped hollow carbon spheres           | 66%                  | 905, 706, 587 and 422 mAh g <sup>-1</sup> @ 0.2, 0.5, 1, and 2 C                       | 1                |
| Hierarchically porous carbon materials       | 48.4%                | 980, 800, 650 and 500 mAh g <sup>-1</sup> @ 0.1, 0.3, 0.5 and 1 C                      | 2                |
| N, O codoped nonporous carbonaceous material | 40%                  | 726, 540, 546, and 558 mAh g <sup>-1</sup> @ 0.2, 0.5, 1, and 2 C                      | 3                |
| N doped hollow carbon nanospheres            | 90.4%                | 1139, 1003, 884, 711, and 476 mAh g <sup>-1</sup> @ 0.2, 0.3, 0.5, 1, and 2 C          | 4                |
| N-doped porous carbon cages                  | 69.58%               | 1047.3, 840.8, 663.4, 515.6 mAh g <sup>-1</sup> @ 0.2, 0.5, 1, and 2 C□                | 5                |
| Activated porous carbon                      | 63%                  | 750, 680, 615, and 520 mAh g <sup>-1</sup> @ 0.2, 0.5, 1, and 2 C□                     | 6                |
| Fish-scale porous carbon                     | –                    | 1071, 864, 539, and 413 mAh g <sup>-1</sup> @ 0.1, 0.2, 0.5, and 1 C□                  | 7                |
| N-doped hierarchical porous carbon           | 53.8%                | 1188.6, 1011.3, 781.5 and 668.1 mAh g <sup>-1</sup> @ 0.2, 0.5, 1, and 2 C□            | 8                |
| Defect-rich hierarchically porous carbon     | 72.21                | 1288, 1005, 884, 771 and 694 mAh g <sup>-1</sup> @ 0.1, 0.2, 0.5, 1, and 2 C           | 9                |
| TD-HDC                                       | 75%                  | 1160.8, 1053.7, 960.3, 855.6 and 648.8 mAh g <sup>-1</sup> at 0.1, 0.2, 0.5, 1 and 2 C | <b>This work</b> |

**Table S4** The impedance parameters of the two Li-S cells based on equivalent circuit fitting of the experimental data.

| Sample | Cycle number     | $R_e$ ( $\Omega$ ) | $R_s$ ( $\Omega$ ) | $R_{ct}$ ( $\Omega$ ) | $W_o$ ( $\Omega$ ) |
|--------|------------------|--------------------|--------------------|-----------------------|--------------------|
| HDC    | Before cycling   | 2.9                | –                  | 74.4                  | 19.6               |
|        | After 200 cycles | 12.7               | 36.5               | 21.5                  | 26.1               |
| TD-HDC | Before cycling   | 5.9                | –                  | 58.7                  | 12.7               |
|        | After 200 cycles | 7.9                | 22.7               | 12.5                  | 18.1               |

## Reference

1. Y. Peng, Y. Zhang, J. Huang, Y. Wang, H. Li, B. J. Hwang and J. Zhao, *Carbon*, 2017, **124**, 23.
2. B. Zhang, M. Xiao, S. Wang, D. Han, S. Song, G. Chen and Y. Meng, *ACS Appl. Mater. Interfaces*, 2014, **6**, 13174.
3. K. Mi, S. Chen, B. Xi, S. Kai, Y. Jiang, J. Feng, Y. Qian and S. Xiong, *Adv. Funct. Mater.*, 2017, **27**, 1604265.
4. J. Hou, X. Tu, X. Wu, M. Shen, X. Wang, C. Wang, C. Cao, H. Pang and G. Wang, *Chem. Eng. J.*, 2020, **401**, 126141.
5. S. Zeng, G. M. Arumugam, X. Liu, Y. Yang, X. Li, H. Zhong, F. Guo and Y. Mai, *Small*, 2020, **16**, 2001027.
6. A. A. Arie, H. Kristianto, E. C. Cengiz and R. Demir-Cakan, *Ionics*, 2019, **25**, 2121.
7. M. Gao, C. Su, M. He, T. Glossmann, A. Hintennach, Z. Feng, Y. Huang and Z. Zhang, *J. Mater. Chem. A*, 2017, **5**, 6725.
8. Q. H. Q. Xiao, G. R. Li, M. J. Li, R. P. Liu, H. B. Li, P. F. Ren, Y. Dong, M. Feng and Z. W. Chen, *J. Energy Chem.*, 2020, **44**, 61.
9. L. Guan, H. Hu, L. Li, Y. Pan, Y. Zhu, Q. Li, H. Guo, K. Wang, Y. Huang, M. Zhang, Y. Yan, Z. Li, X. Teng, J. Yang, J. Xiao, Y. Zhang, X. Wang and M. Wu, *ACS Nano*, 2020, **14**, 6222.
